# Supplementary material for: An optical coherence tomography study of a photoactive Pt(iv) prodrug in oesophageal tissue
Source: Royal Society of Chemistry journal article supplement (doi:10.1039/d4ra08693g), 2025-01-01
Supplement: d4ra08693g1.pdf [file d4ra08693g1.pdf]

## Electronic Supplementary Information

### An optical coherence tomography study of a photoactive Pt(IV) prodrug in oesophageal tissue

Huayun Shi<sup>a,b,c,\*</sup>, Muktesh Mohan<sup>d,e</sup>, Kanwarpal Singh<sup>d,e,f,\*</sup>, Peter J Sadler<sup>a,\*</sup>

<sup>a</sup> Department of Chemistry, University of Warwick, Coventry, CV4 7AL, UK

<sup>b</sup> State Key Laboratory of Vaccines for Infectious Diseases, Center for Molecular Imaging and Translational Medicine, Xiang An Biomedicine Laboratory, School of Public Health, Xiamen University, Xiamen, 361102, China

<sup>c</sup> State Key Laboratory of Molecular Vaccinology and Molecular Diagnostics, National Innovation Platform for Industry-Education Integration in Vaccine Research, Xiamen University, Xiamen, 361102, China

<sup>d</sup> Max-Planck-Institut für die Physik des Lichts, Staudtstraße 2, 91058 Erlangen, Germany

<sup>e</sup> Max-Planck-Zentrum für Physik und Medizin, Kussmaulallee 2, 91054 Erlangen, Germany

<sup>f</sup> Department of Electrical and Computer Engineering, McMaster University, 1280 Main Street West, Hamilton, ON, L8S 4K1, Canada

#### Experimental section.

##### Materials and instruments.

##### Materials.

**FM-190** was prepared using the modified synthetic route reported previously.<sup>S1</sup> **FM190** was fully characterized, including UV-vis, <sup>1</sup>H, <sup>13</sup>C and <sup>195</sup>Pt NMR spectroscopy, and ESI-MS.<sup>S1</sup> The <sup>1</sup>H NMR and UV-vis spectrum of **FM190** used in the work matched well with our previous report, and the HPLC purity was > 99%. The complex is not luminescent.

Dulbecco's Phosphate-Buffered Saline (PBS) was from Biowest.

Swine oesophagus tissue was from a local (Erlangen) meat market.

##### Instruments.

Electronic absorption spectra were recorded on a Hitachi U-3900H UV-vis spectrophotometer in a quartz cuvette and solvent used as reference. The spectral width was 200–600 nm and the resolution was 1.0 nm, the scan rate was set to 600 nm/min.

The laser used for irradiation was from Roithner Lasertechnik GmbH, Austria (445 nm, 250 mW/cm<sup>2</sup>) and the optical fibre was a multimode fibre (M96L01, 105 micron diameter) from Thorlabs, USA.

##### Optical coherence tomography system

The current version of the optical coherence tomography system is also known as spectral domain optical coherence tomography (SD-OCT, Figure S1). A supercontinuum laser (SC-laser, YSL Photonics, Wuhan, China) is used as a broadband light source, filtered using a short-pass dichroic mirror (DMSP950T, Thorlabs, Newton, NJ, USA), having a central wavelength 850 nm, and was coupled to a single-mode fiber. The laser source operated at 200 MHz,

providing a total width half maximum bandwidth of 80 nm. A 75:25 wideband fiber coupler (TW850R3A2, Thorlabs, Newton, NJ, USA) splits incoming light into a reference path and a sample path. 25% of the input light was used to illuminate the sample, and 75% of light illuminated the reference mirror.

The reference path has a collimator, lens (AC254-030-AB, Thorlabs, Newton, NJ, USA), and a mirror. The sample arm has a collimator, a two-axis galvo scanner (GVS012, Thorlabs, Newton, NJ, USA) controlled via a data acquisition card (DAQ, USB-6211, NI, Austin, TX, USA) for performing raster scanning over the sample surface, a focusing lens and sample stage. Backscattered light from the sample and reflected light from the reference mirror were combined by a fiber coupler and projected on a holographic grating (1200 lines per millimeter, 840 nm, Wasatch, Logan, UT, USA). A lens (AC-254-080-B, Thorlabs, Newton, NJ, USA) was used to focus the light spectra on a line scan camera (2048 pixels, ral2048-48gm, Basler, Ahrensburg, Germany). The spectroscopic signal was acquired using a computer connected via GigE-vision at 25kHz. Further, acquired data sets were processed through a custom-designed LabVIEW program that includes static noise removal, dispersion compensation, spectral reshaping from wavelength space to wavenumber space, and a fast Fourier transform to obtain an axial profile of the sample.

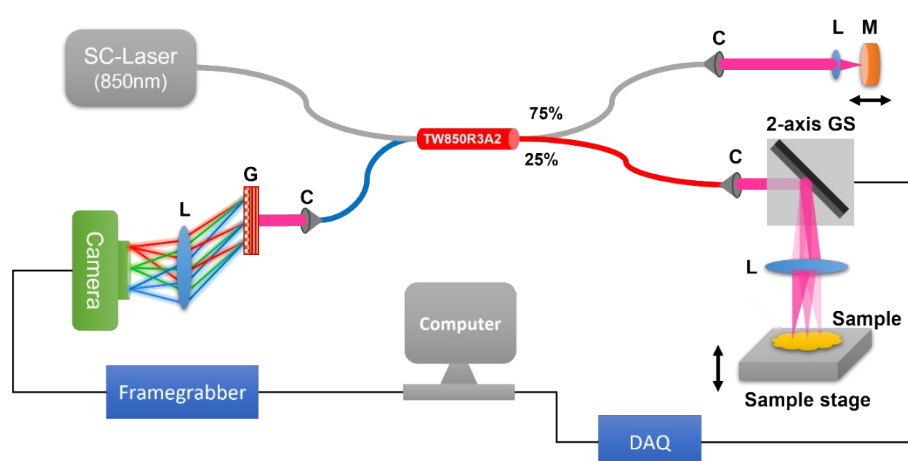

**Figure S1.** Schematic of Spectral Domain Optical Coherence Tomography (SD-OCT) system. SC-laser: supercontinuum laser, C: collimator, L: lens, M: mirror, 2-axis GS: two-axis galvo scanner, G: holographic grating, DAQ: data acquisition card.<sup>S2</sup>

**Photoactivation in solution.** The photoactivation of **FM-190** ( $OD_{300} = 1$ ) in water was monitored by UV-vis spectroscopy at 1 min time intervals upon irradiation with blue laser light (445 nm) at 298 K.

**OCT sample preparation.** A 200  $\mu$ L PBS solution of **FM190** with different concentrations (0, 100, 500 and 1000  $\mu$ M) was dropped into the mucosa of a piece of swine oesophagus tissue (ca.  $1 \times 1$   $cm^2$ ), which was then incubated in the dark at 310 K for 2 h. After obtaining the dark image, the tissue was irradiated with blue laser light (445 nm) for 10 min, and then the same area was scanned for the irradiated image.

## References

- S1. N. J. Farrer, J. A. Woods, L. Salassa, Y. Zhao, K. S. Robinson, G. Clarkson, F. S. MacKay and P. J. Sadler, *Angew. Chem. Int. Ed.*, 2010, **49**, 8905–8908.
- S2. G. Sharma, A. Parmar, F. Hoffmann, K. Geißler, F. von Eggeling, O. Guntinas-Lichius, and K. Singh, *Photonics*, 2024, **9**, 259.
